# Supplementary material for: Stability of Begomoviral pathogenicity determinant βC1 is modulated by mutually antagonistic SUMOylation and SIM interactions
Source: PubMed Central journal article supplement (PMC7461331; doi:10.1186/s12915-020-00843-y), 2020-08-31
Supplement: 12915_2020_843_MOESM1_ESM.pdf [file 12915_2020_843_MOESM1_ESM.pdf]

# Stability of Begomoviral pathogenicity determinant $\beta$ C1 is modulated by mutually antagonistic SUMOylation and SIM interactions

Ashwin Nair<sup>1, 2</sup>, Kiran Sankar Chatterjee<sup>1</sup>, Vikram Jha<sup>1, 3</sup>, Ranabir Das<sup>1</sup>, and P. V. Shivaprasad<sup>1\*</sup>

This file contains following information:

## Additional File 1: Fig.S1-19

**Fig.S1:** SyYVCV  $\beta$ C1 has multiple conserved SUMOylation sites.

**Fig.S2:** SyYVCV  $\beta$ C1 can interact with *NbSUMO1*.

**Fig.S3:** SyYVCV  $\beta$ C1 induces various developmental defects in transgenic plants.

**Fig.S4:** SyYVCV  $\beta$ C1 undergoes SUMOylation *in planta*.

**Fig.S5:** SyYVCV  $\beta$ C1 weakly interacts with other plant SUMO proteins.

**Fig.S6:** SUMOylation of  $\beta$ C1 is required for symptom development.

**Fig.S7:** SUMOylation is required for the stability of  $\beta$ C1 *in planta*.

**Fig.S8:** SIM sites in SyYVCV  $\beta$ C1 and phylogeny of its potential partner SUMO proteins.

**Fig.S9:** Expression analysis and purification of plant SUMO proteins.

**Fig.S10:** Sequence of SIM mutants.

**Fig.S11:** SIM sites in  $\beta$ C1 C-terminal end interact with *NbSUMO1*.

**Fig.S12:** SIM sites in SyYVCV  $\beta$ C1 regulate its stability.

**Fig.S13:** SIM and SUMOylation motifs of  $\beta$ C1 are necessary for its pathogenicity determinant function.

**Fig.S14:** SUMOylation motif in  $\beta$ C1 is important for its subcellular localization.

**Fig.S15:** SyYVCV  $\beta$ C1 induces global SUMOylation.

**Fig.S16:** SIM and SUMOylation motif of  $\beta$ C1 is essential for host defense suppression

**Fig.S17:** Conservation of SUMOylation sites among viruses producing similar symptoms.

**Fig.S18:** Uncropped images of blots in main figures 1-7 and replicates of western blots.

**Fig.S19:** Uncropped images of blots in Supplementary Figures 1-16.

A)

| Site | AA  | Sequence                            | Type           | P.S. |
|------|-----|-------------------------------------|----------------|------|
| Ss1  | K18 | F I V <b>D V K</b> L M Q E D<br>←   | INV. consensus | Low  |
| Ss2  | K24 | K L M Q <b>E D K</b> I S V Q I<br>← | INV. consensus | High |
| Ss3  | K83 | T I G E <b>F K Q</b> E D M I E<br>→ | Consensus      | Low  |

B)

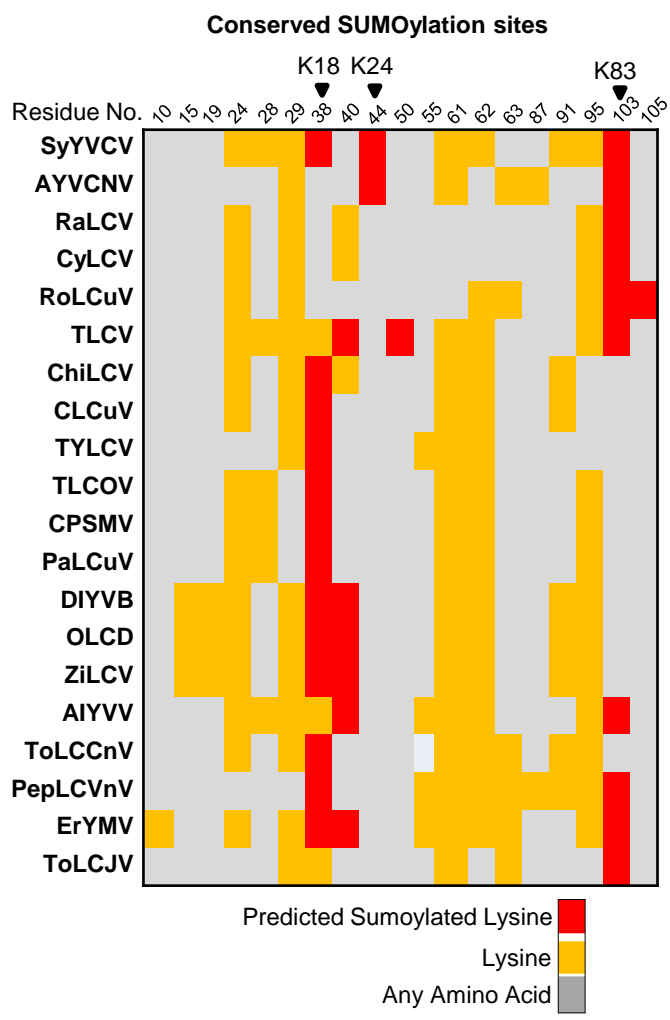

Fig.S1: SyYVCV  $\beta$ C1 has multiple conserved SUMOylation sites.

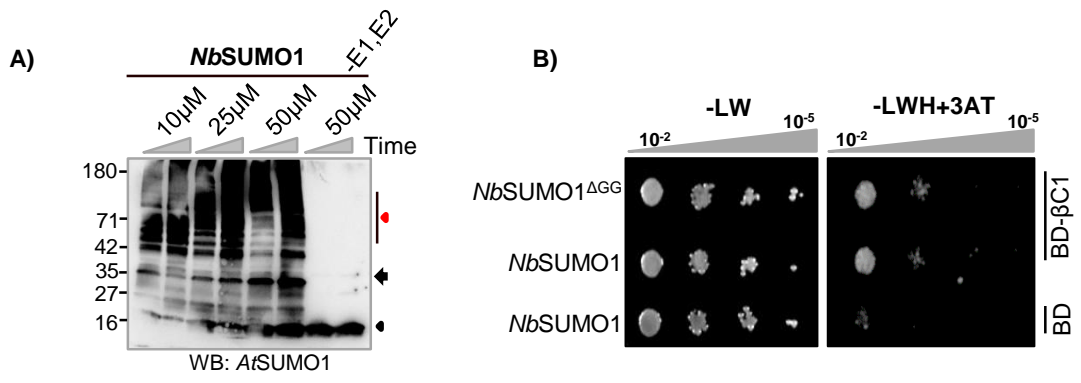

**Fig.S2: SyYVCV βC1 can interact with *NbSUMO1*.**

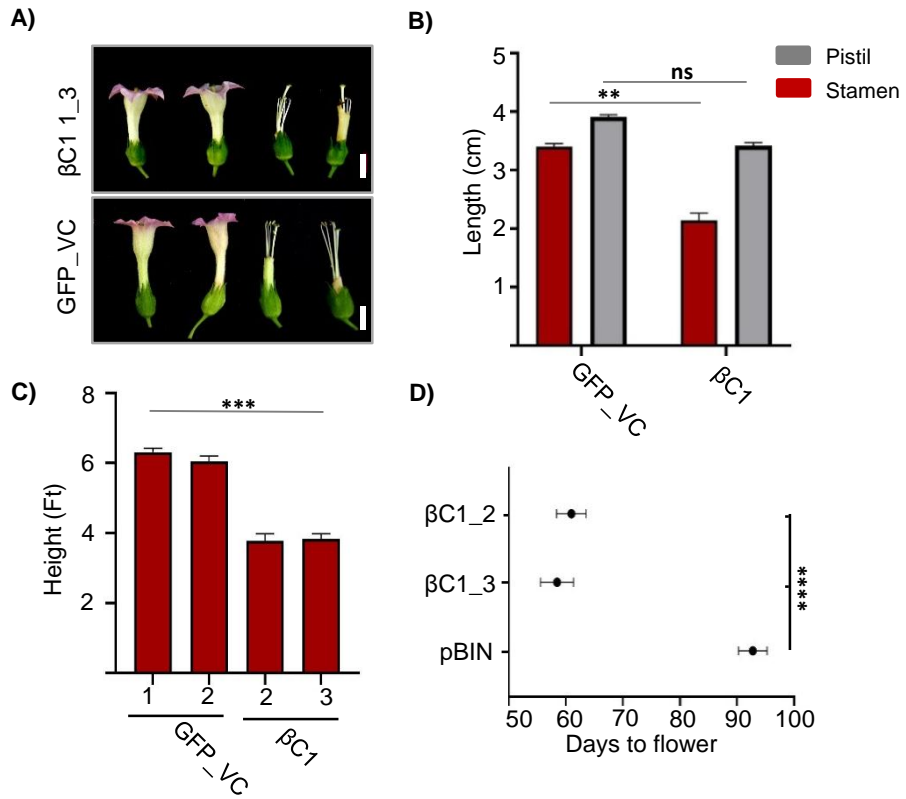

**Fig.S3: SyYVCV  $\beta C1$  induces various developmental defects in transgenic plants.**

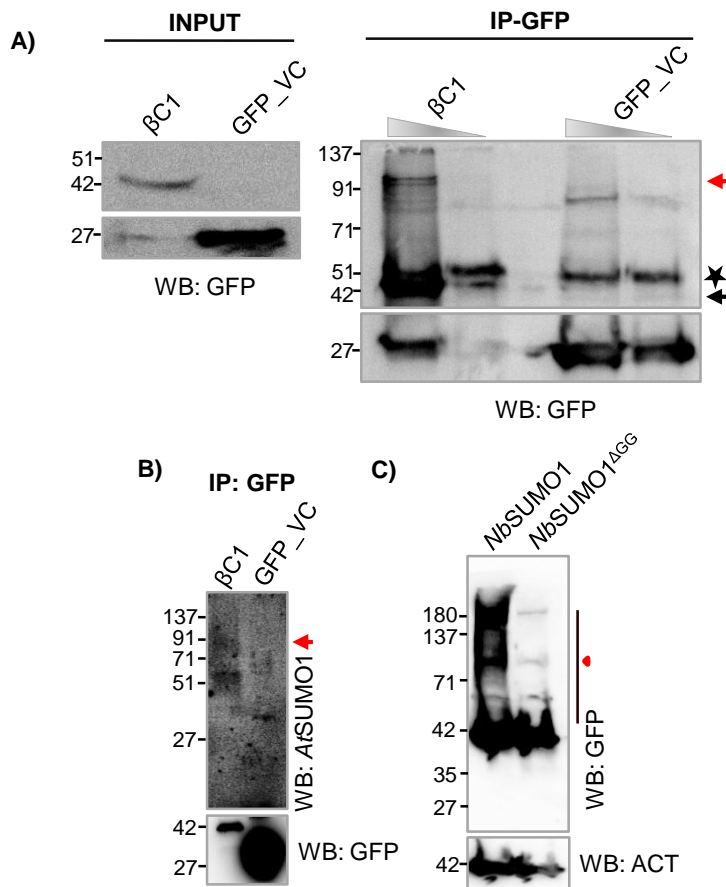

**Fig.S4: SyYVCV  $\beta$ C1 undergoes SUMOylation *in planta*.**

A)

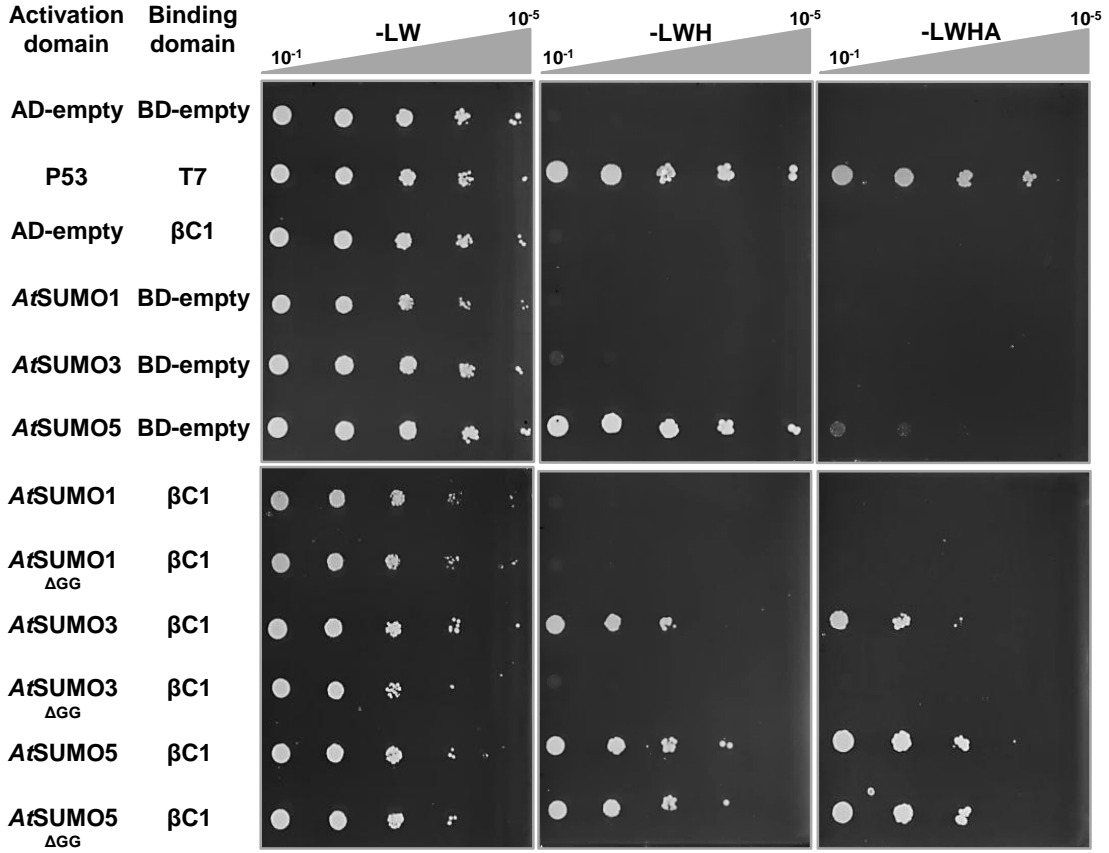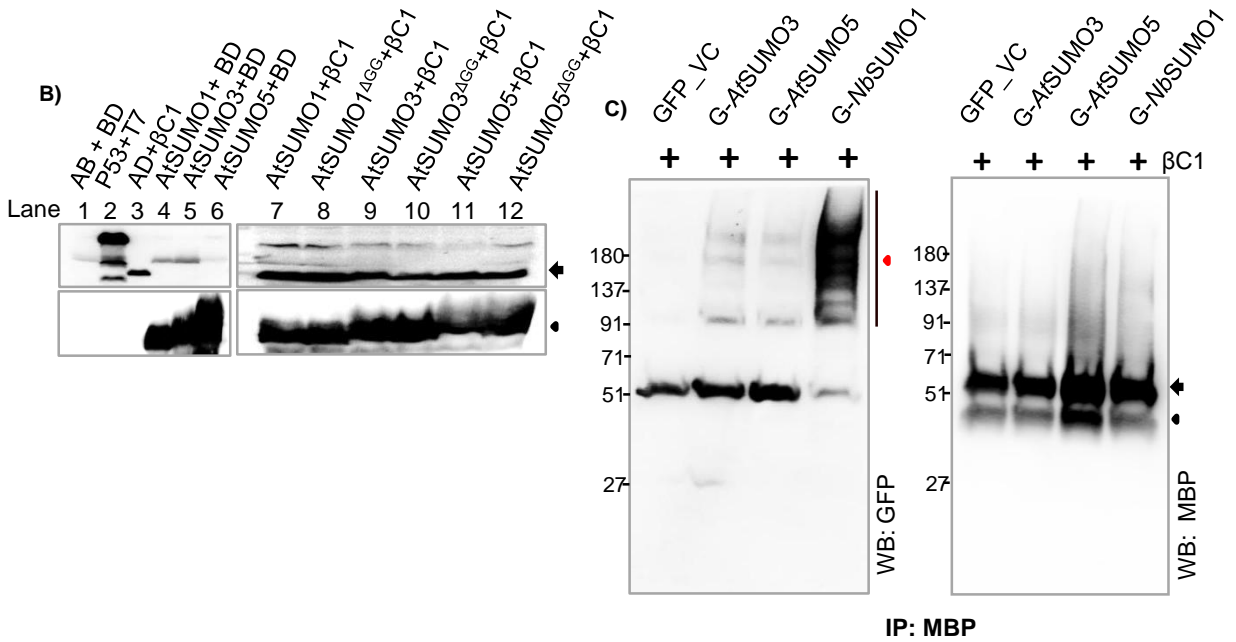

Fig.S5: SyYVCV βC1 weakly interacts with other plant SUMO proteins.

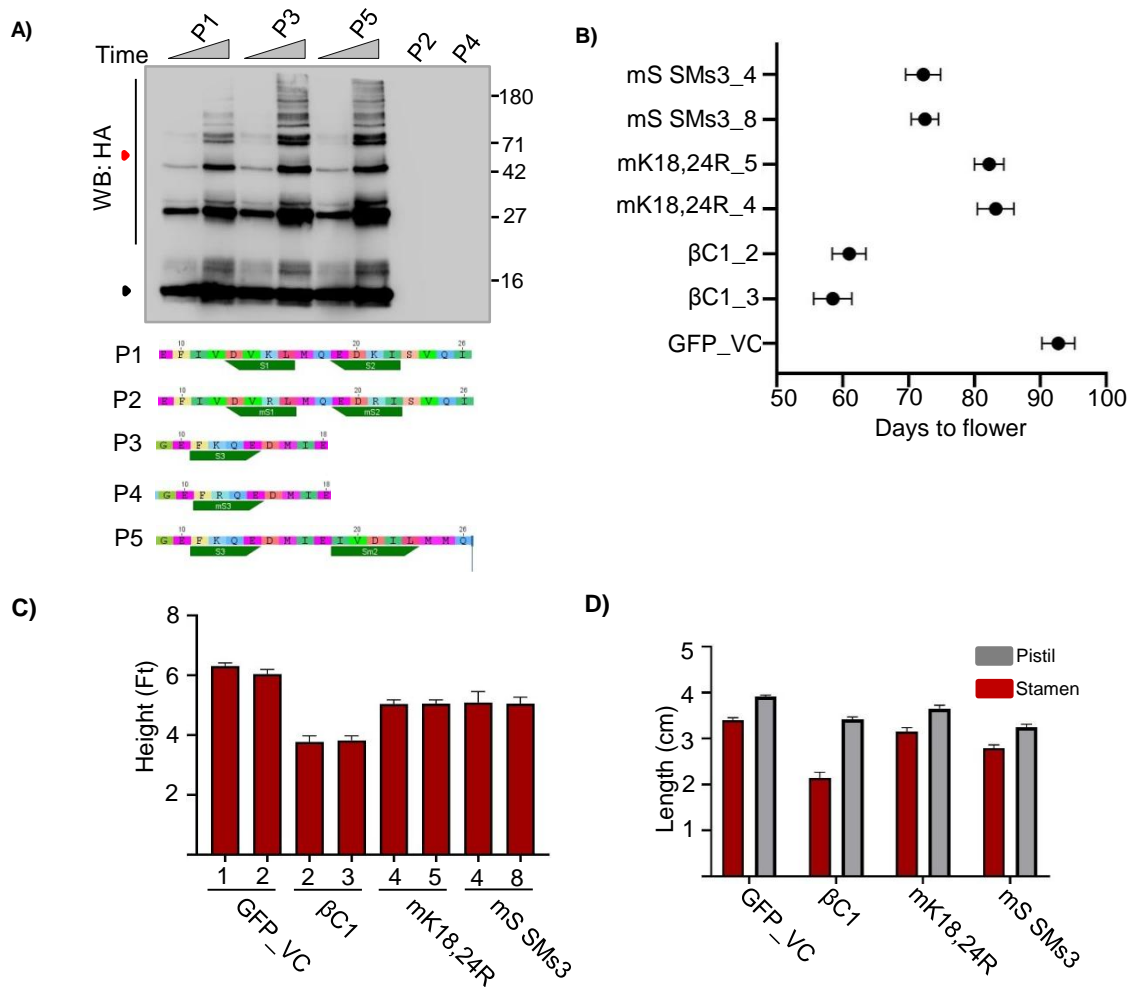

**Fig.S6: SUMOylation of  $\beta$ C1 is required for symptom development.**

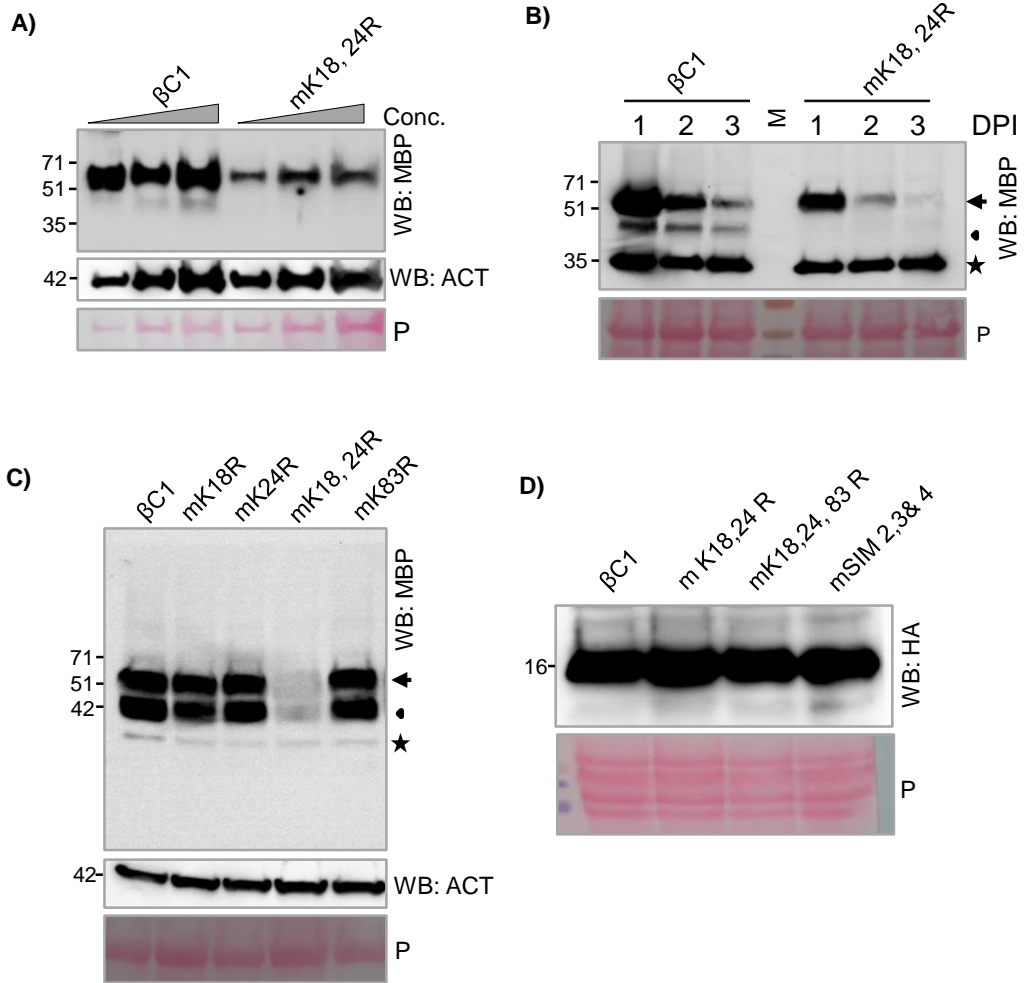

**Fig.S7: SUMOylation is required for the stability of  $\beta C1$  in planta.**



A)

| Domain | Sequence                  | Type        | PS    | AA No.         |
|--------|---------------------------|-------------|-------|----------------|
| SIM s1 | G M E F I V D V K L M Q   | SIM $\beta$ | 4.191 | <b>14-17</b>   |
| SIM s2 | D M I E I V D I L M M Q E | SIM $\beta$ | 4.501 | <b>90-93</b>   |
| SIM s3 | M I E I V D I L M M Q E   | SIM 2       | 0.918 | <b>91-94</b>   |
| SIM s4 | Q E A P V I D I N V S D E | SIM $\beta$ | 24.07 | <b>101-104</b> |

B)

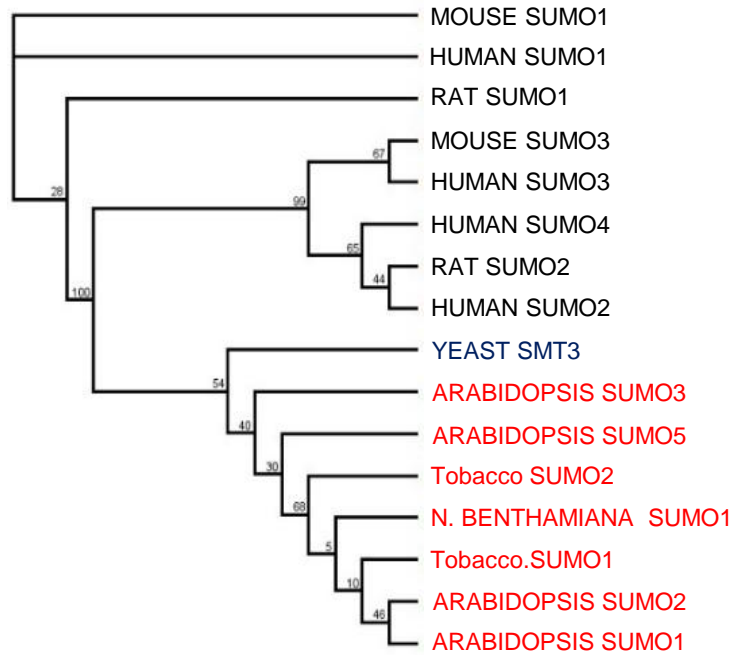

Fig.S8: SIM sites in SyYVCV  $\beta$ C1 and phylogeny of its potential partner SUMO proteins.

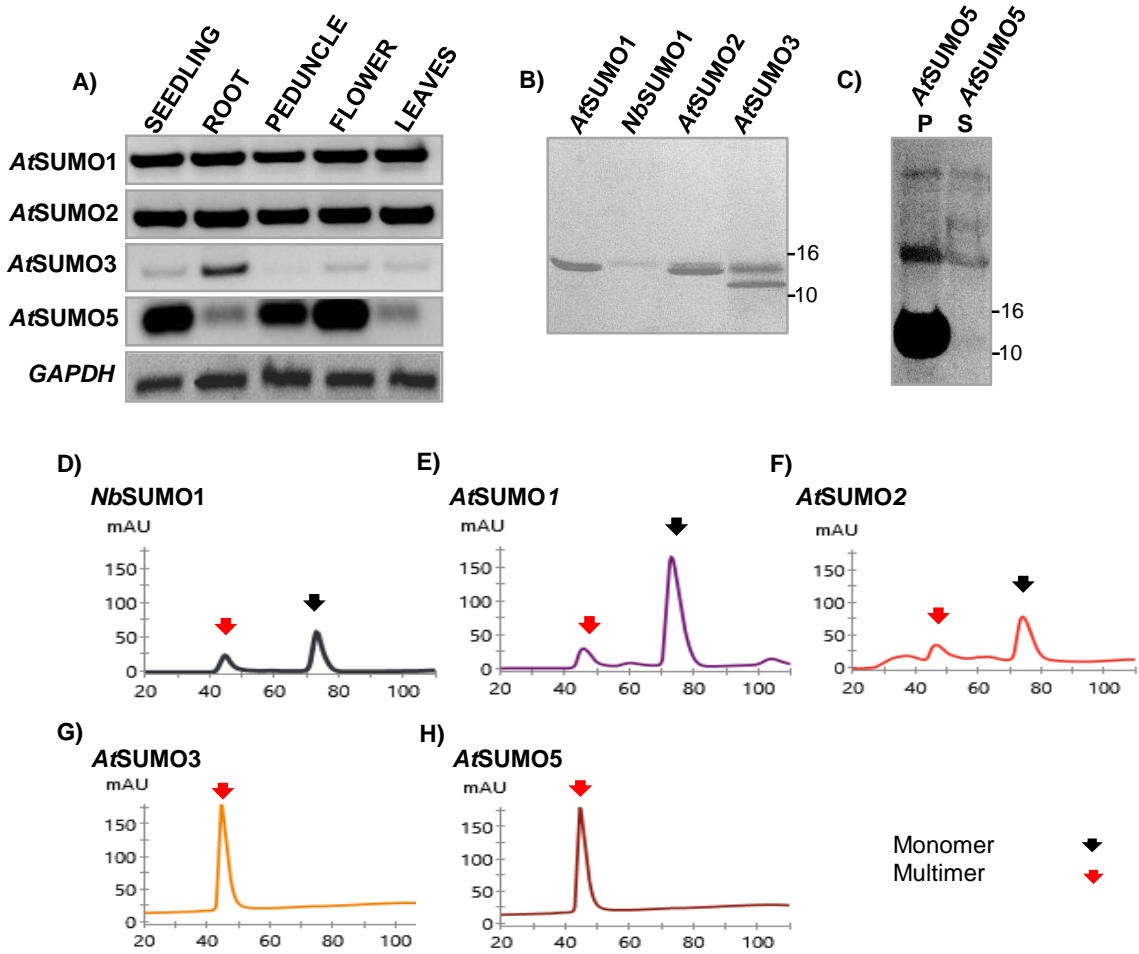

**Fig.S9: Expression analysis and purification of plant SUMO proteins.**

A)

pSIM1 : KKGMEF**IVDV**KLMQEDKI  
pmSIM1 : WKKGMEF**AADA**KLMQEDKI  
pSIM 2,3 : KQEDMIE**VDIL**MMQEAPVI  
pmSIM2,3 : WKQEDMIEI**ADAA**MMQEAPVI  
pSIM4 : ILMMQEAP**VIDI**NVSDEYEV  
pmSIM4 : WILMMQEAP**AADA**NVSDEYEV

B)

| Residue No.       | 14          | 18          | 90         | 95 | 101 | 105          | 118                                     |
|-------------------|-------------|-------------|------------|----|-----|--------------|-----------------------------------------|
| SyYVCV $\beta$ C1 | M- <b>F</b> | <b>I</b>    | <b>VDV</b> | K- | I   | <b>EI</b>    | <b>VDI</b> L- <b>PVI</b> <b>DI</b> N- V |
| mSIM 1            | M- <b>F</b> | <b>AAAA</b> | <b>K</b>   | -  | I   | <b>EI</b>    | <b>VDI</b> L- <b>PVI</b> <b>DI</b> N- V |
| mSIM 2,3          | M- <b>F</b> | <b>I</b>    | <b>VDV</b> | K- | I   | <b>EAAAA</b> | L- <b>PVI</b> <b>DI</b> N- V            |
| mSIM 4            | M- <b>F</b> | <b>I</b>    | <b>VDV</b> | K- | I   | <b>EI</b>    | <b>VDI</b> L- <b>PAAAA</b> N- V         |
| mSIM 2,3,4        | M- <b>F</b> | <b>I</b>    | <b>VDV</b> | K- | I   | <b>EAAAA</b> | L- <b>PAAAA</b> N- V                    |
| mS SIM 2,3        | M- <b>F</b> | <b>I</b>    | <b>VDV</b> | K- | I   | <b>EI</b>    | <b>KAI</b> L- <b>PVI</b> <b>DI</b> N- V |
| mS SIM 4          | M- <b>F</b> | <b>I</b>    | <b>VDV</b> | K- | I   | <b>EI</b>    | <b>VDI</b> L- <b>PVI</b> <b>SGN</b> - V |

Fig.S10: Sequence of SIM mutants.

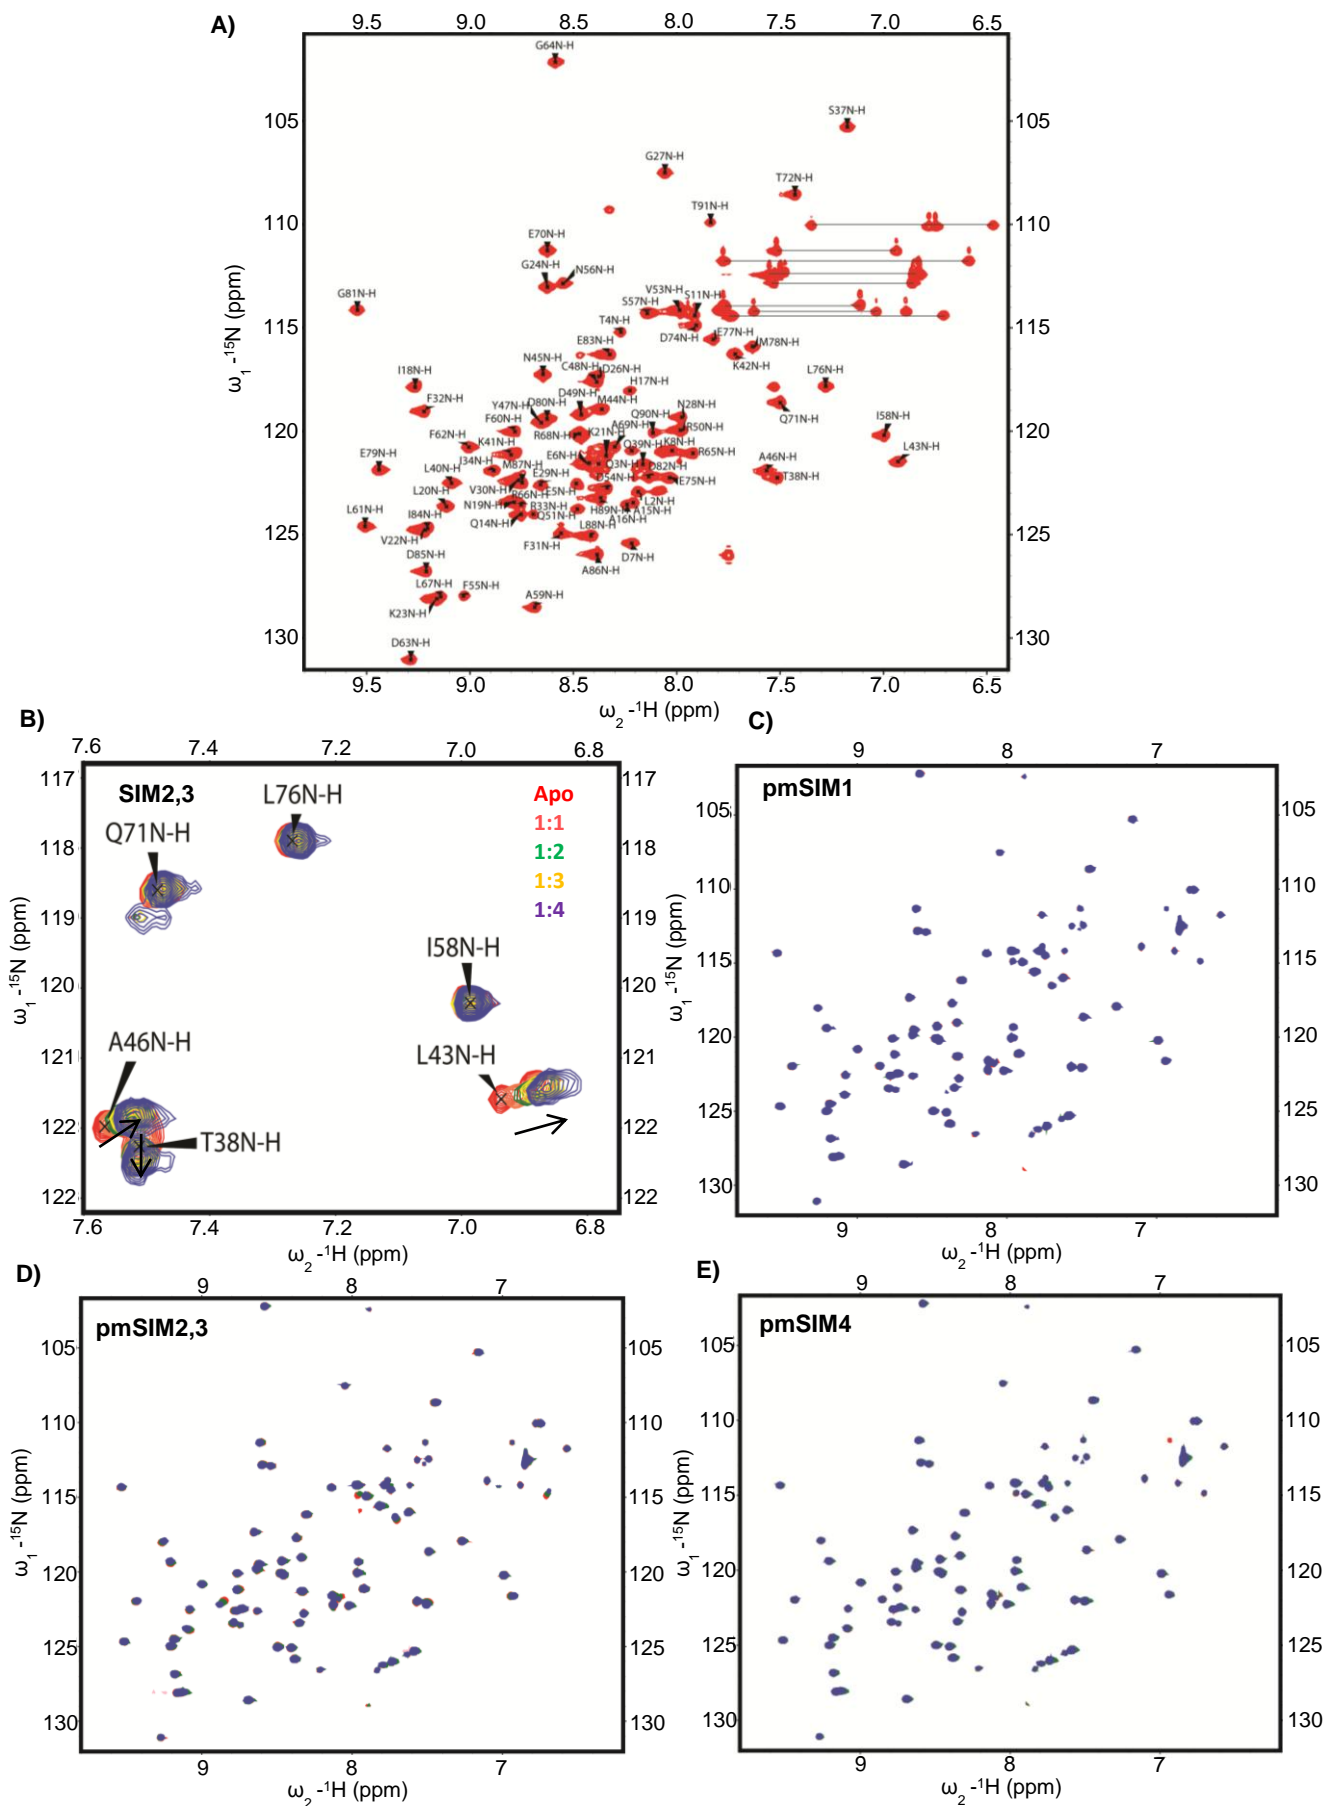

**Fig.S11: SIM sites in  $\beta\text{C1}$  C-terminal end interact with *Nb*SUMO1.**

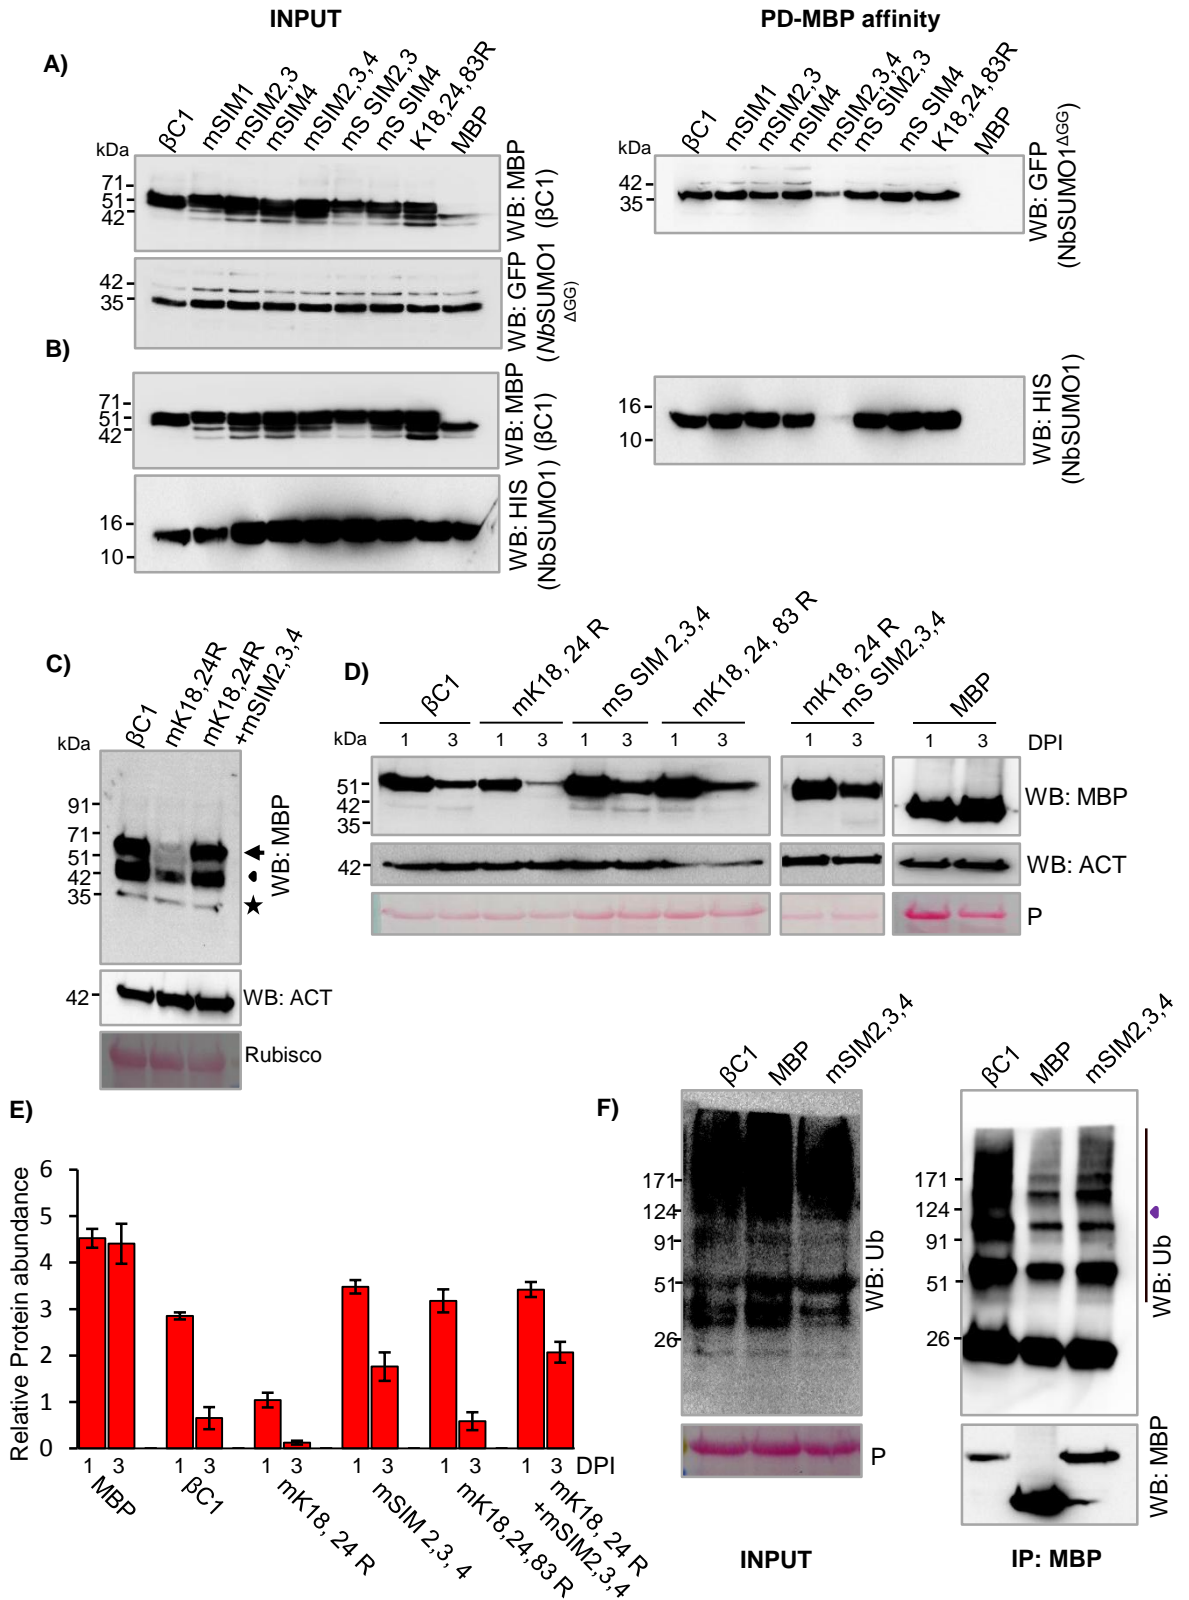

Fig.S12: SIM sites in SyYVVCV βC1 regulate its stability.

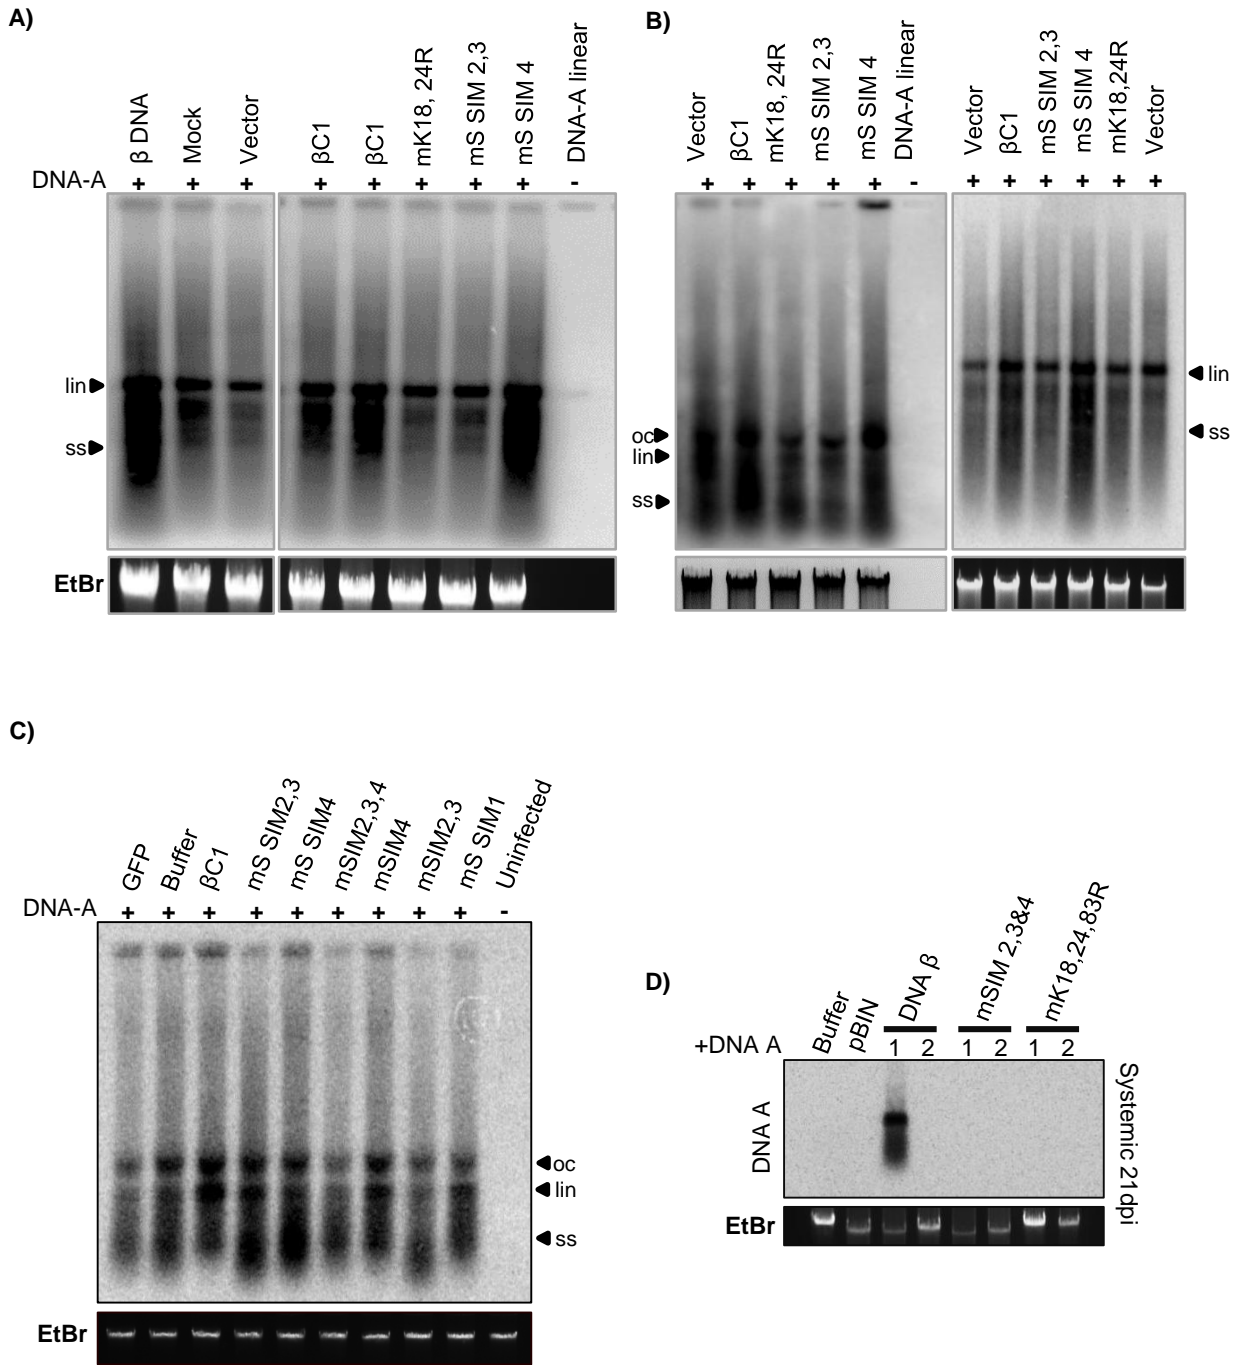

Fig.S13: SIM and SUMOylation motifs of  $\beta$ C1 are necessary for its pathogenicity determinant function.

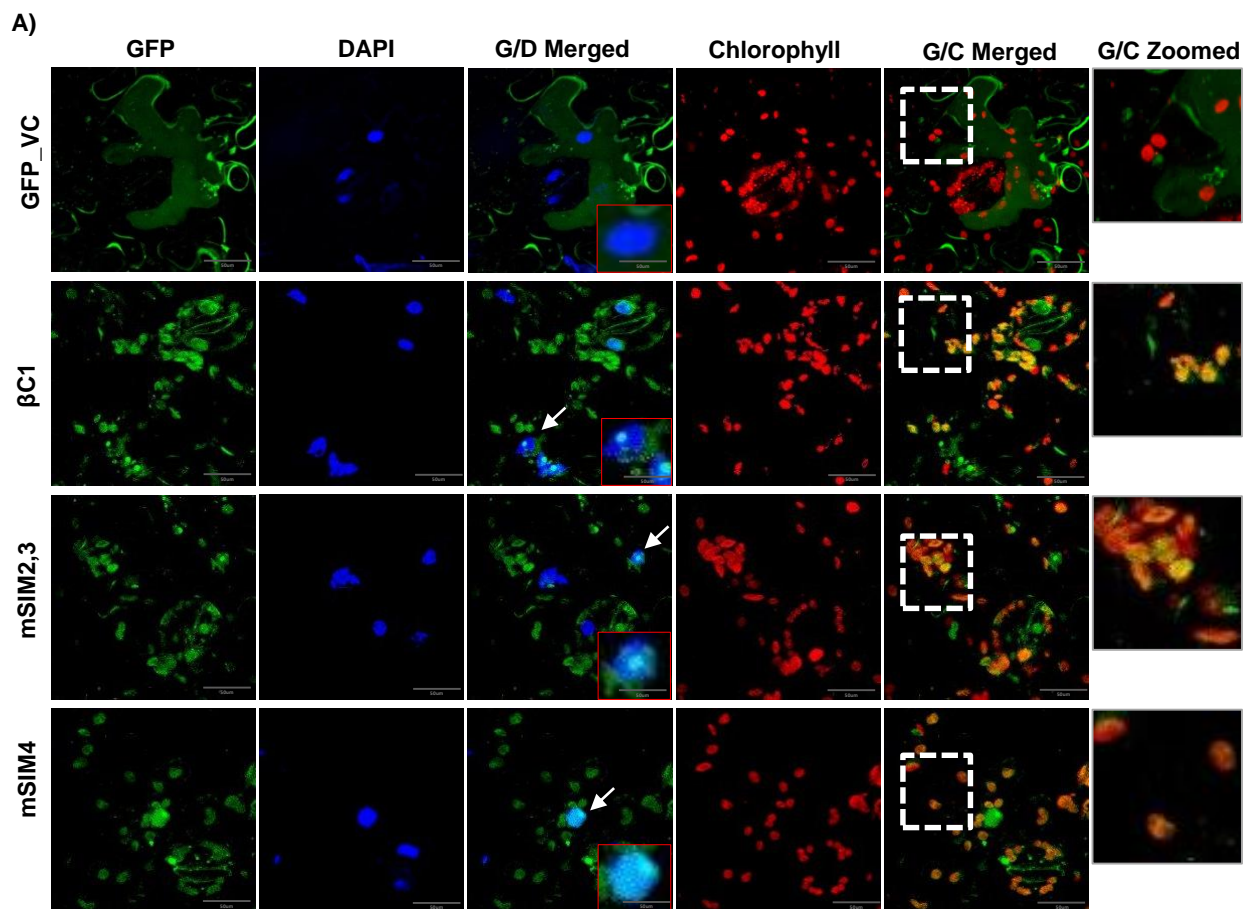

Fig.S14: SUMOylation motif in  $\beta$ C1 is important for its subcellular localization.

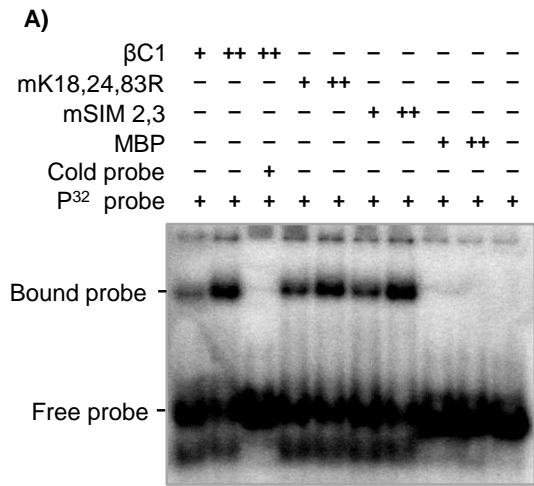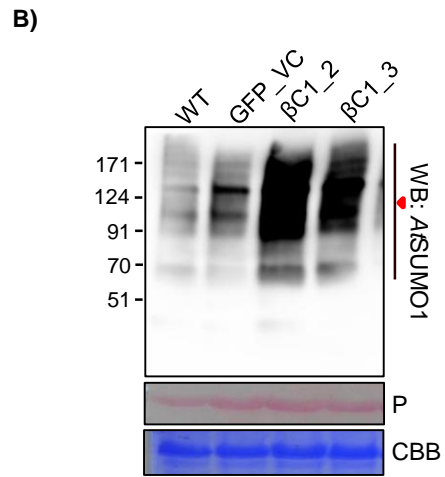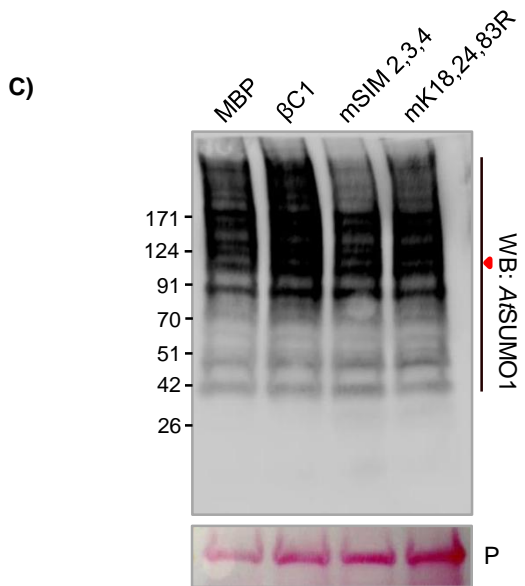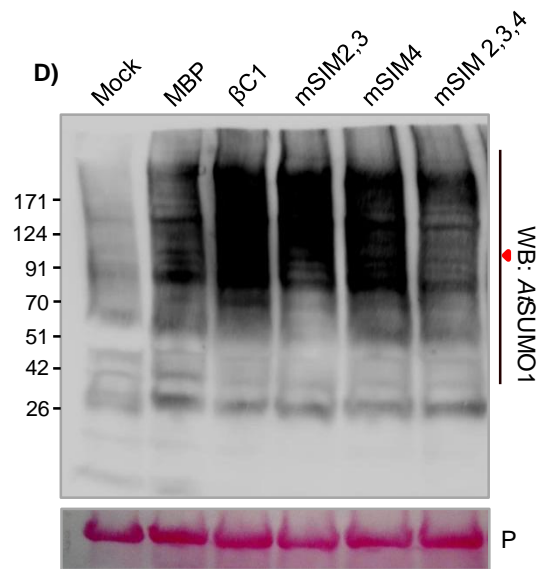

**Fig.S15: SyYVCV  $\beta$ C1 induces global SUMOylation.**



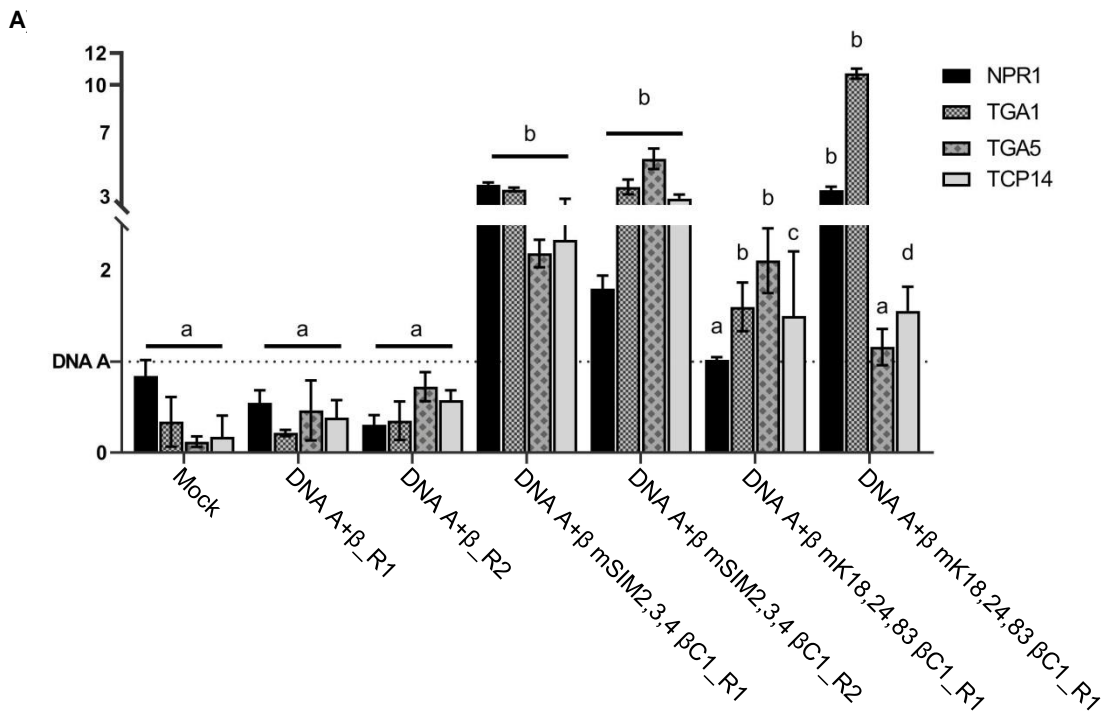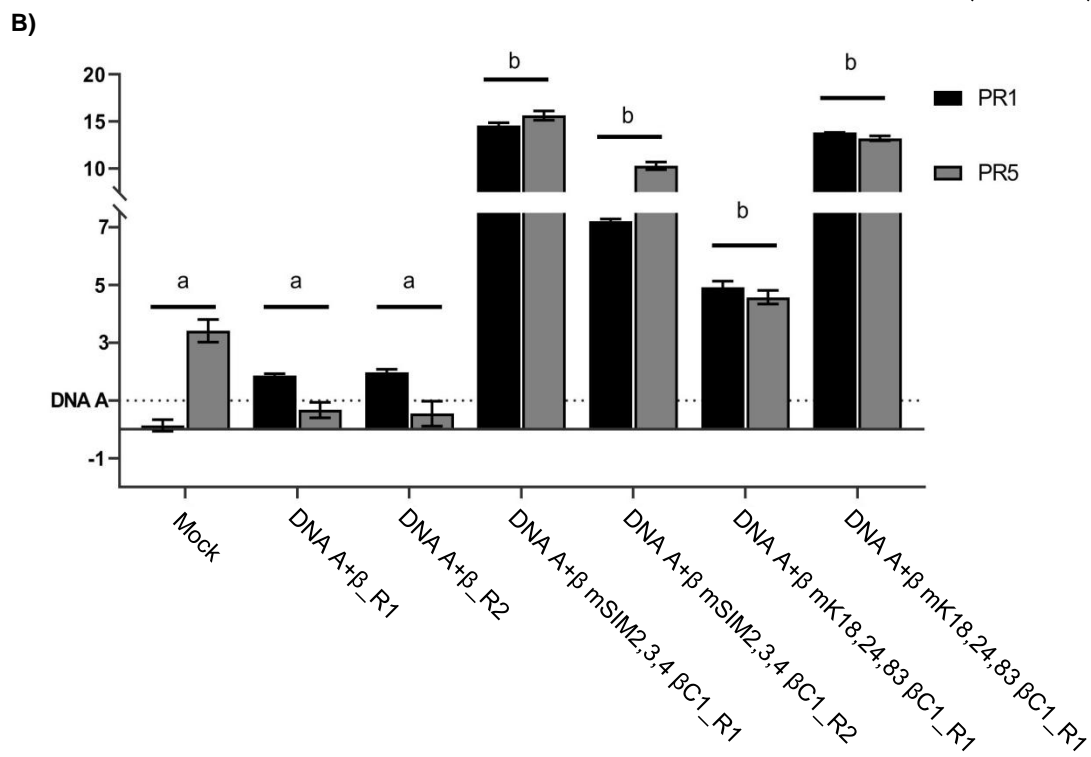

**Fig.S16: SIM and SUMOylation motifs of  $\beta$ C1 is essential for host defense suppression.**

A)

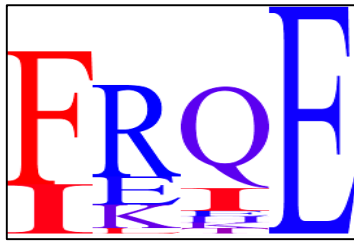

|   |   |   |   |                                          |
|---|---|---|---|------------------------------------------|
| F | R | Q | E | Ageratum leaf curl virus                 |
| F | R | Q | E | Chilli leaf curl virus                   |
| F | R | Q | E | Chilli leaf curl virus pakistan          |
| I | R | T | E | Cotton leaf curl Gezira virus            |
| I | E | I | E | Cotton leaf curl Multan virus            |
| I | E | I | E | Cotton leaf curl virus                   |
| I | E | K | E | Cotton leaf curl virus                   |
| F | R | Q | E | Cowpea severe leaf                       |
| I | E | I | E | Kenaf leaf curl virus pakistan           |
| I | E | I | E | Ludwigia leaf curl distortion virus      |
| F | R | H | E | Malvastrum leaf curl virus Guangdong     |
| I | L | E | E | Okra leaf curl virus                     |
| F | R | Q | E | Okra leaf curl virus                     |
| F | K | Q | E | Papaya leaf curl virus NBRI              |
| F | R | Q | E | Pepper leaf curl virus                   |
| F | K | Q | E | Potato apical leaf curl virus            |
| F | R | Q | E | Sida leaf curl virus                     |
| F | K | Q | E | Tobacco leaf curl virus S2202            |
| F | K | Q | E | Tomato leaf curl China virus             |
| F | R | Q | E | Tomato leaf curl virus                   |
| F | R | Q | E | Tomato leaf curl virus                   |
| F | R | Q | E | Tomato leaf curl virus                   |
| F | R | Q | E | Tomato leaf curl virus Jeddah            |
| F | R | Q | E | Tomato yellow leaf curl China virus SC65 |
| F | R | Q | E | Tomato yellow leaf curl China virus Y10  |
| F | R | Q | E | Tomato yellow leaf curl China virus_Y278 |

B)

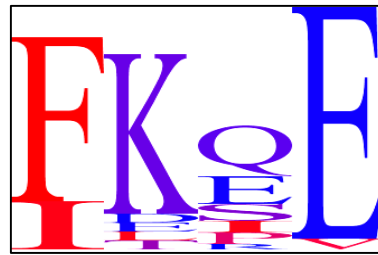

|   |   |   |   |                                        |
|---|---|---|---|----------------------------------------|
| F | K | Q | E | Synedrella yellow vein clearing virus  |
| F | K | Q | E | Ageratum yellow vein China virus       |
| F | K | Q | E | Ageratum yellow vein virus             |
| F | K | Q | E | Alternanthera yellow vein virus        |
| F | K | Q | E | Andrographis yellow vein virus         |
| I | L | Q | E | Bhendi yellow vein mosaic virus        |
| F | K | Q | E | Corchorus yellow vein mosaic virus     |
| F | K | Q | E | Croton yellow vein mosaic virus        |
| F | K | Q | E | Digera arvensis yellow vein virus      |
| I | E | Q | E | Eclipta yellow vein virus              |
| F | K | Q | E | Emilia yellow vein virus               |
| F | K | Q | E | Eupatorium yellow vein virus           |
| F | K | Q | E | Honeysuckle yellow vein mosaic virus   |
| F | K | Q | E | Kadam yellow mosaic virus              |
| F | K | Q | E | Leucas zeylanica yellow vein virus     |
| F | K | Q | E | Lindernia anagallis yellow vein virus  |
| F | K | Q | E | Lindernia anagallis yellow vein virus  |
| I | D | Q | V | Malvastrum yellow vein virus           |
| F | K | Q | E | Radish leaf curl virus                 |
| I | T | Q | E | Siegesbeckia yellow vein Guangxi virus |
| F | K | Q | E | Spinach yellow vein virus              |
| F | K | Q | E | Vernonia yellow vein Fujian virus      |

Fig.S17: Conservation of SUMOylation sites among viruses producing similar symptoms..

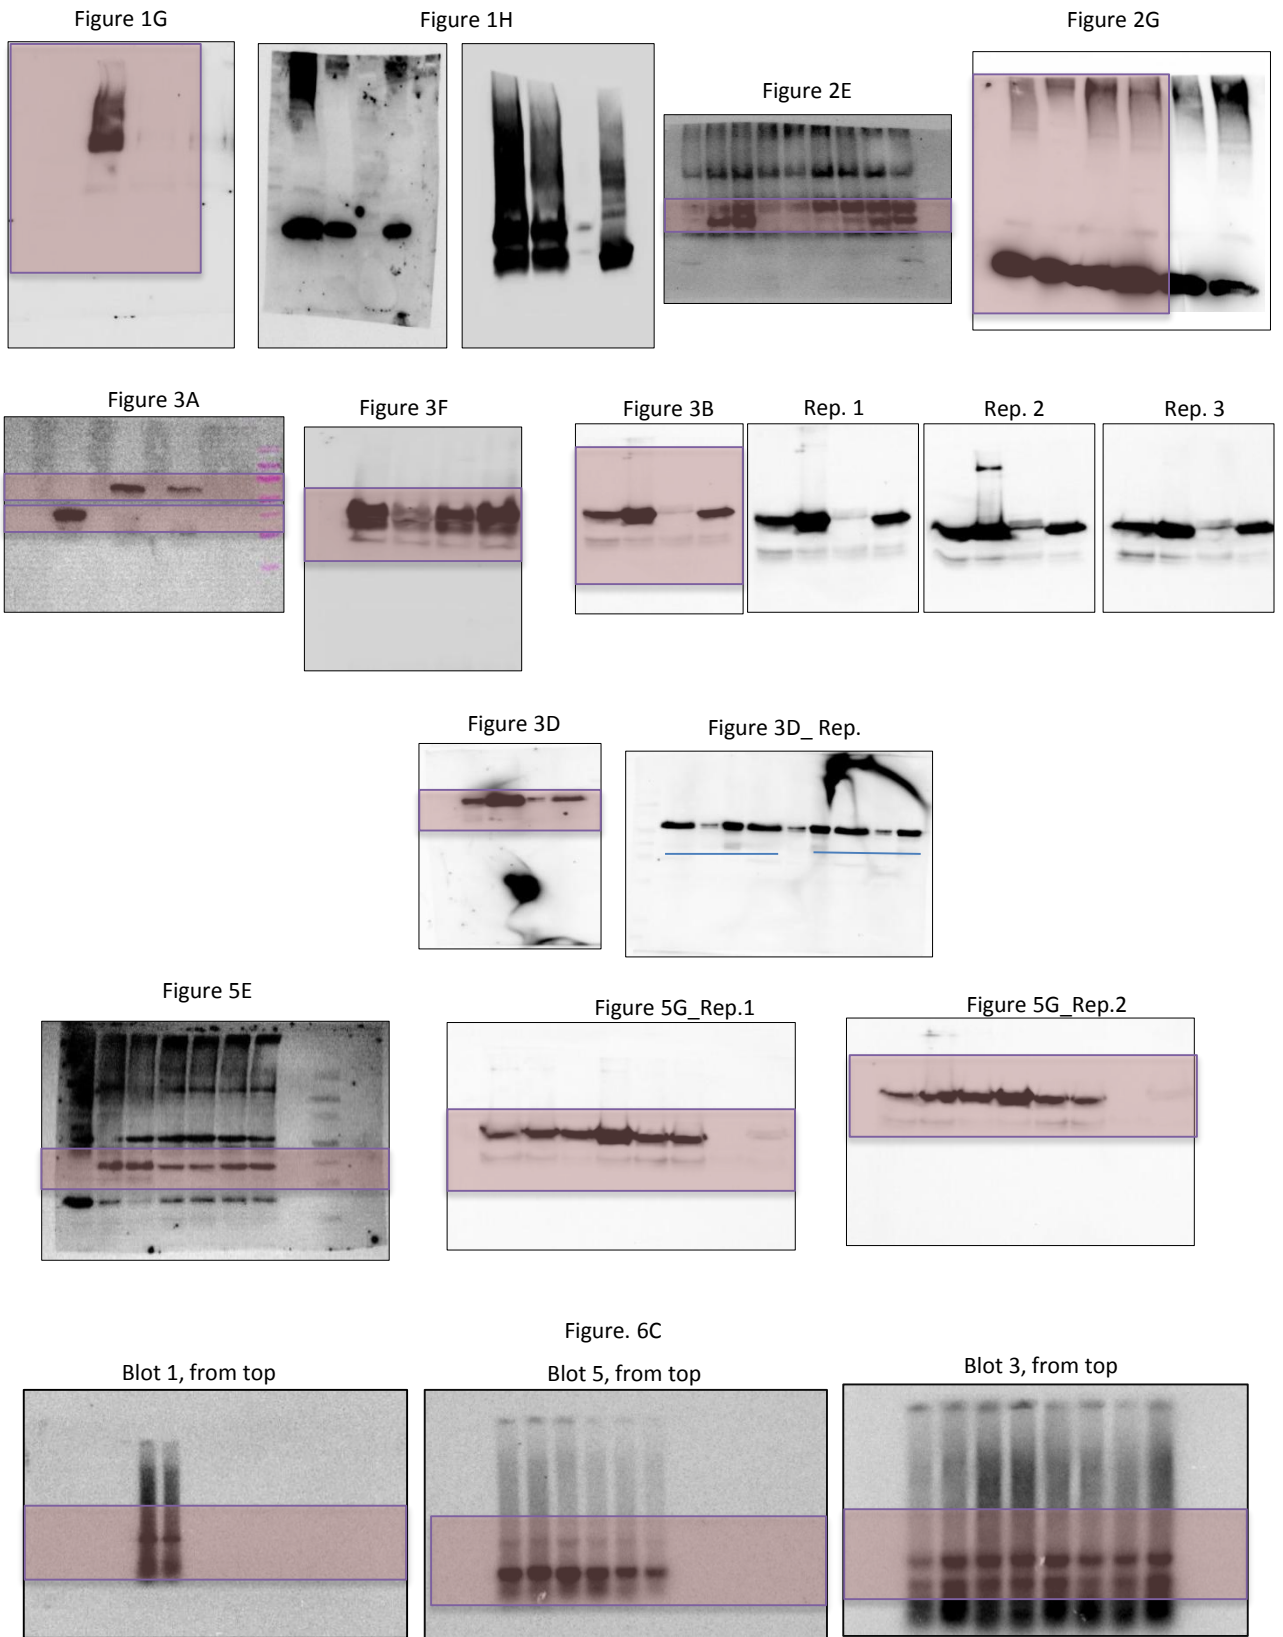

**Fig.S18: Uncropped images of blots in main figures 1-7 and replicates of western blots.**

S. Figure 4A

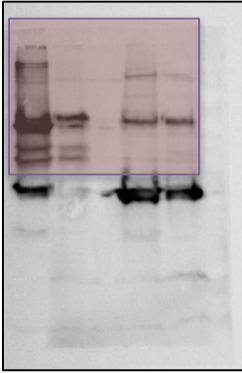

S. Figure 4B

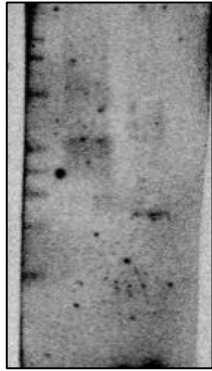

S. Figure 7A

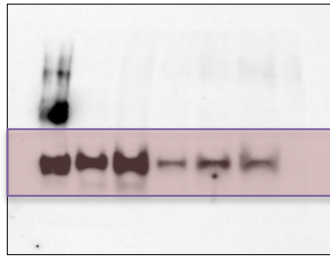

S. Figure 7B

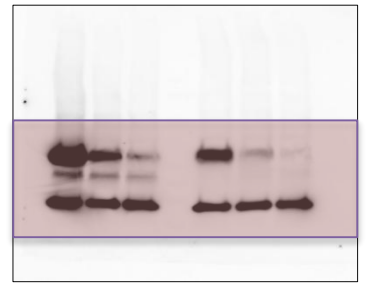

S. Figure 7D

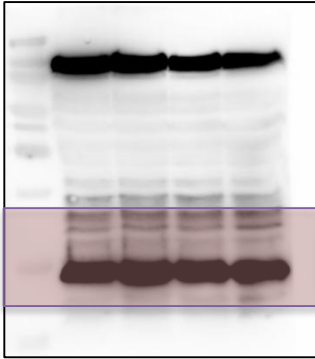

S. Figure 12A

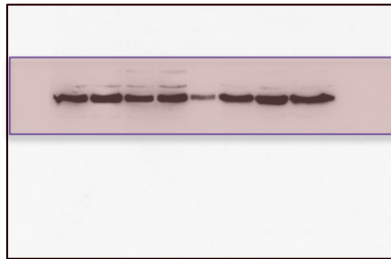

S. Figure 12B

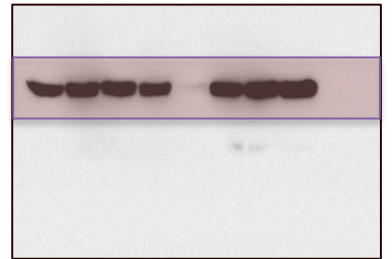

S. Figure 12D

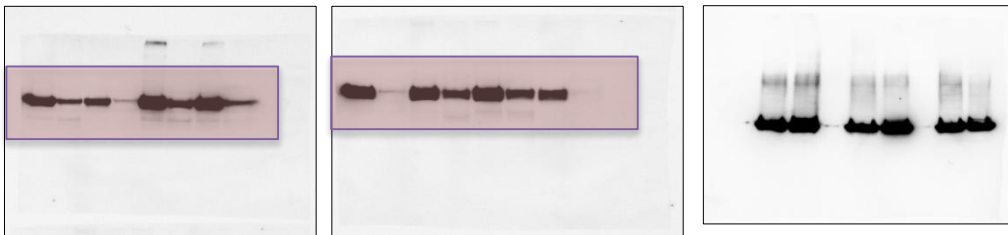

Fig.S19: Uncropped images of blots in Supplemental Figure 1-16.
